# Supplementary material for: Applications of Maple to algebraic cryptography
Source: HighWire-hosted journal article supplement (doi:10.1136/jitc-2024-009693), 1997-09-01
Supplement: jitc-2024-009693supp002_data_supplement.xlsx [file jitc-2024-009693supp002_data_supplement.xlsx]

## Sheet: S1
Supplemental Table S1. Characteristics of the analyzed cohorts.
Cohort	In-house	MDACC	Broad	CHOICE-01	MSKCC-34	MSKCC-240	MSKCC-350	MSKCC-246
Journal	NA	Nat Commun	Nat Genet	JCO	Science	JCO	Nat Genet	NA
DOI	NA	doi: 10.1038/s41467-023-36328-z	doi: 10.1038/s41588-023-01355-5	doi: 10.1200/JCO.22.00727	doi:10.1126/science.aaa1348	doi:10.1200/JCO.2017.75.3384	doi:10.1038/s41588-018-0312-8
Year	NA	2023	2022	2022	2015	2018	2019	2020
Regimen	Anti-PD-1/PD-L1	Anti-PD-1/PD-L1 alone or with chemotherapy	Anti-PD-1/PD-L1	Toripalimab plus chemotherapy or chemotherapy alone	Pembrolizumab	Anti-PD-1/PD-L1 alone or with anti-CTLA-4	Anti-CTLA4, anti-PD-1/PD-L1 or combination	Anti-PD-1/PD-L1 alone or with anti-CTLA-4
Setting	Real-world	Real-world	Real-world	Clinical trial	Clinical trial	Clinical trial and real-world	Clinical trial and real-world	Real-world
Treatment lines	First to subsequent	First to third	First to subsequent	First	Not mentioned	First to subsequent	Not mentioned
Outcome	ORR, PFS, OS	PFS, OS	ORR, PFS, OS	ORR, PFS, OS	ORR, PFS	ORR, PFS	OS	ORR, PFS, OS
PD-L1 IHC testing	Dako 22C3	Dako 22C3 internal stain at MD Anderson or reported by external lab reports	Dako 22C3 Dako 28-8 CST E1L3N	MEDx JS311	Dako 22C3	Dako 22C3 Dako 28-8 CST E1L3N	/	Not mentioned
NGS testing	Tissue and/or blood samples	Tissue and/or blood samples	Tissue sample	Blood sample	Tissue sample	Tissue sample	Tissue sample	Tissue sample
	SNV	SNV, fusion	SNV, mRNA	SNV	SNV	SNV, CNV, fusion	SNV, fusion	SNV, CNV, fusion
	ctDNA: 3D Medicines, 150-gene Tissue: whole-exome sequencing or Burning Rock Biotech, OncoScreen Plus: 520-gene	CtDNA: MD Anderson Liquid biopsy panel (70 genes) or the Guardant360 panel (74 genes) Tissue: The MD Anderson Molecular Diagnostics Laboratory tissue molecular proﬁling uses NGS-based analysis to detect mutations in 134 or 146 genes	Whole-exome sequencing GTEx RNA-seq pipeline	Burning Rock Biotech, OncoScreen Plus: 520-gene	Whole-exome sequencing	MSKCC panel: 341-gene; 410-gene; 468-gene	MSKCC panel: 341-gene; 410-gene; 468-gene	MSKCC panel: 341-gene; 410-gene; 468-gene
TMB data	Available	Not available	Available	Available	Available	Available	Available	Available
Source of data	Sending request to the corresponding authors	Supplemental Materials	Supplemental Materials	Sending request to the corresponding authors	http://science.sciencemag.org/content/suppl/2015/03/11/science.aaa1348.DC1 http://www.cbioportal.org/study?id= tmb_mskcc_2018	Supplemental Materials http://www.cbioportal.org/study?id= tmb_mskcc_2018	Supplemental Materials http://www.cbioportal.org/study?id= tmb_mskcc_2018
Total number of nqNSCLC patients	150	852	239	242	533
No. of pts with no PD-L1 testing	20	391	85	0	273
No. of pts with high tumoral PD-L1 expression (TPS>=50)	38	133	61	46	69
No. of patients treated at later lines (>=4)	9	0	15	0	10
No. of patients treated with anti-CTLA-4	0	0	28	0	48
No. of patients Included in the present study	83	328	50	196	133

## Sheet: S2
Supplemental Table S2. Characteristics of the in-house cohort.
	Category	No.	Proportion
Age
	>=65	18	21.7%
	<65	65	78.3%
Sex
	Female	32	38.6%
	Male	51	61.4%
Smoking status
	Ever-smoker	20	24.1%
	Non-smoker	25	30.1%
	NA	38	45.8%
Stage
	IIIB	2	2.4%
	IV	72	86.7%
	NA	9	10.8%
Treatment lines
	1	66	79.5%
	2	3	3.6%
	3	14	16.9%
Tumoral PD-L1 expression
	[1, 50)	50	60.2%
	<1	33	39.8%
NGS testing
	WES	36	43.4%
	ctDNA (150-gene)	33	39.8%
	ctDNA (520-gene)	14	16.9%

## Sheet: S3
Supplemental Table S3. Definition of pathways
Key genes	EGFR	TP53	STK11	NFE2L2	KRAS	NRAS	BRAF	NOTCH1	NOTCH2	FBXW7	SMAD4	ARID1A	NF1	SMO
WNT pathway	APC	CTNNB1
Cell cycle pathway	RB1	CDKN2A	JAK2
PI3K pathway	PIK3CA	PTEN	TSC1	AKT1	MTOR
RTKs	ERBB2	PDGFRA	FGFR1	FGFR2	FGFR3
HRR pathway	ATM	BRCA1	BRCA2

## Sheet: S4
Supplemental Table S4. Characteristics of the prognosis cohort.
	Category	No.	Proportion
Sex
	Female	598	59.1%
	Male	414	40.9%
Source
	Lung Adenocarcinoma Met Organotropism (MSK, Cancer Cell 2023)	139	13.7%
	LUAD Lung Adenocarcinoma (OncoSG, Nat Genet 2020)	19	1.9%
	Lung Adenocarcinoma (TCGA, PanCancer Atlas)	22	2.2%
	Metastatic Non-Small Cell Lung Cancer (MSK, Nature Medicine 2022)	827	81.7%
	Pan-Lung Cancer (TCGA, Nat Genet 2016)	5	0.5%
	Thoracic Cancer (MSK, Nat Commun 2021)	1	0.1%

## Sheet: S5
Supplemental Table S5. Characteristics of the Broad cohort.
ID	ISAC	Group	EGFR	TP53	STK11	WNT	PIK3CA	RTKs	HRR	NF1	Center	Age	Sex	Smoking Pack Years	PDL1 TPS	PD-L1 Antibody Clone	Line of Therapy	Agent PD1	Agent PD1 Category	Prior Platinum	Prior TKI	Confirmed BOR
SU2CLC-DFC-1002-T1	-0.799517	PD-L1-low/ISAC-low	1	0	0	0	0	0	0	0	Dana-Farber Cancer Institute	48	F	0	0.01	E1L3N	4	Nivolumab	PD(L)1	1	1	PD
SU2CLC-DFC-DF0561-T1	-0.222141	PD-L1-low/ISAC-low	0	0	1	0	0	0	0	0	Dana-Farber Cancer Institute	69	F	15	0	E1L3N	2	Atezolizumab	PD(L)1	1	0	PD
SU2CLC-COL-1033-T1	0	PD-L1-low/ISAC-low	0	0	0	0	0	0	0	0	Columbia University	64	M	4	0.3	22C3	2	Nivolumab + Ipilimumab	PD(L)1 + CTLA4	1	0	SD
SU2CLC-DFC-1013-T1	0.0875448	PD-L1-low/ISAC-high	0	0	1	0	0	0	1	0	Dana-Farber Cancer Institute	60	M	20	0	NA	3	Nivolumab	PD(L)1	1	0	PD
SU2CLC-DFC-1536-T1	0.0875448	PD-L1-low/ISAC-high	0	0	1	0	0	0	1	0	Dana-Farber Cancer Institute	70	F	15	0.05	E1L3N	2	Pembrolizumab	PD(L)1	1	0	PR
SU2CLC-MGH-1575-T1	0.209367	PD-L1-low/ISAC-high	0	1	1	0	0	0	0	0	Massachusetts General Hospital	62	F	30	0.15	E1L3N	2	Pembrolizumab	PD(L)1	1	0	PD
SU2CLC-DFC-1020-T1	0.431507	PD-L1-low/ISAC-high	0	1	0	0	0	0	0	0	Dana-Farber Cancer Institute	44	F	0	0.2	E1L3N	1	Nivolumab	PD(L)1	0	0	PR
SU2CLC-COL-1001-T1	0.431507	PD-L1-low/ISAC-high	0	1	0	0	0	0	0	0	Columbia University	70	M	39	0.1	22C3	2	Pembrolizumab	PD(L)1	1	0	SD
SU2CLC-MGH-1415-T1	0.431507	PD-L1-low/ISAC-high	0	1	0	0	0	0	0	0	Massachusetts General Hospital	70	F	19	0.01	E1L3N	1	Pembrolizumab	PD(L)1	0	0	CR
SU2CLC-DFC-DF0790-T1	0.687974	PD-L1-low/ISAC-high	0	1	0	1	0	1	0	1	Dana-Farber Cancer Institute	65	F	4	0	E1L3N	2	Nivolumab	PD(L)1	1	0	PR
SU2CLC-MGH-1572-T1	0.97665	PD-L1-low/ISAC-high	0	1	0	0	0	1	0	0	Massachusetts General Hospital	63	M	20	0	E1L3N	2	Atezolizumab	PD(L)1	1	0	PD
SU2CLC-COL-1008-T1		PD-L1-high									Columbia University	59	F	20	0.6	22C3	2	Pembrolizumab	PD(L)1	1	0	SD
SU2CLC-COL-1017-T1		PD-L1-high									Columbia University	67	M	100	0.7	22C3	1	Pembrolizumab	PD(L)1	0	0	PR
SU2CLC-COL-1020-T1		PD-L1-high									Columbia University	51	F	10	0.6	22C3	1	Pembrolizumab	PD(L)1	0	0	SD
SU2CLC-COL-1023-T1		PD-L1-high									Columbia University	47	M	120	0.9	22C3	1	Pembrolizumab	PD(L)1	0	0	SD
SU2CLC-COL-1032-T1		PD-L1-high									Columbia University	55	F		0.9	22C3	1	Pembrolizumab	PD(L)1	0	0	SD
SU2CLC-COL-1034-T1		PD-L1-high									Columbia University	70	F	10	0.9	22C3	1	Pembrolizumab	PD(L)1	0	0	SD
SU2CLC-COL-1036-T1		PD-L1-high									Columbia University	49	M	20	0.8	22C3	1	Pembrolizumab	PD(L)1	0	0	CR
SU2CLC-COL-1037-T1		PD-L1-high									Columbia University	55	F	25	0.6		2	Pembrolizumab	PD(L)1	1	0	PR
SU2CLC-COL-1038-T1		PD-L1-high									Columbia University	51	F	0	0.5	22C3	3	Durvalumab + Tremelimumab	PD(L)1 + CTLA4	1	0	PD
SU2CLC-DFC-1534-T1		PD-L1-high									Dana-Farber Cancer Institute	72	M	4	0.6	E1L3N	2	Nivolumab	PD(L)1	1	0	PD
SU2CLC-DFC-1537-T1		PD-L1-high									Dana-Farber Cancer Institute	62	F	30	0.5	E1L3N	2	Pembrolizumab	PD(L)1	1	0	PR
SU2CLC-DFC-DF0499-T1		PD-L1-high									Dana-Farber Cancer Institute	47	F	15	0.95	E1L3N	2	Pembrolizumab	PD(L)1	1	0	SD
SU2CLC-DFC-DF0510-T1		PD-L1-high									Dana-Farber Cancer Institute	52	F	40	0.8	E1L3N	1	Pembrolizumab	PD(L)1	0	0	SD
SU2CLC-DFC-DF0512-T1		PD-L1-high									Dana-Farber Cancer Institute	73	F	30	0.8	E1L3N	1	Pembrolizumab	PD(L)1	0	0	SD
SU2CLC-DFC-DF0668-T1		PD-L1-high									Dana-Farber Cancer Institute	74	M	40	0.8	E1L3N	3	Pembrolizumab	PD(L)1	1	0	PD
SU2CLC-DFC-DF0840-T1		PD-L1-high									Dana-Farber Cancer Institute	54	F		0.6	E1L3N	1	Pembrolizumab	PD(L)1	0	0	PD
SU2CLC-MGH-1161-T2		PD-L1-high									Massachusetts General Hospital	73	M	26	0.9	E1L3N	1	Pembrolizumab	PD(L)1	0	0	CR
SU2CLC-MGH-1412-T1		PD-L1-high									Massachusetts General Hospital	75	F	5	0.9	E1L3N	1	Pembrolizumab	PD(L)1	0	0	PR
SU2CLC-MGH-1490-T1		PD-L1-high									Massachusetts General Hospital	52	F	20	0.8	E1L3N	1	Pembrolizumab	PD(L)1	0	0	PR
SU2CLC-MGH-1493-T1		PD-L1-high									Massachusetts General Hospital	64	F	35	0.9	E1L3N	1	Pembrolizumab	PD(L)1	0	0	SD
SU2CLC-MGH-1568-T1		PD-L1-high									Massachusetts General Hospital	68	F	60	0.9	E1L3N	1	Pembrolizumab	PD(L)1	0	0	PD
SU2CLC-MSK-1365-T1		PD-L1-high									Memorial Sloan Kettering	73	M	0	0.95	E1L3N	2	Pembrolizumab	PD(L)1	1	0	SD
SU2CLC-MSK-A2060-T1		PD-L1-high									Memorial Sloan Kettering	71	M	41	0.8	28-8	1	Nivolumab + Ipilimumab	PD(L)1 + CTLA4	0	0	PR
SU2CLC-MSK-A2075-T1		PD-L1-high									Memorial Sloan Kettering	74	F	40	0.82	28-8	2	Nivolumab + LAG-3	PD(L)1 + Other	1	0	PR

## Sheet: S6
Supplemental Table S6. Characteristics of the patients for ISAC development and validation.
		First-line				Second/third-line
	Category	ICI alone	ICI + chemo	Chemo	P value	ICI alone	ICI + chemo	P value
Age					0.09			0.19
	>=65	62.6% (92/147)	57.5% (165/287)	71.4% (50/70)		47.2% (128/271)	66.7% (10/15)
	<65	37.4% (55/147)	42.5% (122/287)	28.6% (20/70)		52.8% (143/271)	33.3% (5/15)
Sex					0.16			1
	Female	55.1% (81/147)	61.3% (176/287)	68.6% (48/70)		45.0% (122/271)	46.7% (7/15)
	Male	44.9% (66/147)	38.7% (111/287)	31.4% (22/70)		55.0% (149/271)	53.3% (8/15)
Tumoral PD-L1 expression					0.16			0.098
	<1	40.1% (59/147)	49.1% (141/287)	41.4% (29/70)		63.5% (172/271)	40.0% (6/15)
	[1, 50)	59.9% (88/147)	50.9% (146/287)	58.6% (41/70)		36.5% (99/271)	60.0% (9/15)
TMB					0.24			NA
	<=median	51.5% (53/103)	54.8% (69/126)	64.3% (45/70)		54.0% (88/163)	NA
	>median	48.5% (50/103)	45.2% (57/126)	35.7% (25/70)		46.0% (75/163)	NA

## Sheet: S7
Supplemental Table S7. Ineteraction effect between treatment effect and each mutational event in the first-line training set.
Gene	Frequency	Gene HR	Lower CI	Higher CI	P (gene)	Tx HR	Lower CI	Higher CI	P (treatment)	Interaction HR	Lower CI	Higher CI	P (interaction)
WNT	0.0965517	4.93847	1.94031	12.5694	0.000806334	0.678999	0.50952	0.904851	0.00823165	0.269257	0.0928816	0.780556	0.015684
JAK2	0.0206897	5.20672	1.25318	21.6328	0.023175	0.691504	0.523706	0.913063	0.00928635	0.0876772	0.0118971	0.646148	0.0169167
CTNNB1	0.0310345	3.76281	1.16263	12.1782	0.0270063	0.693865	0.52472	0.917534	0.010357	0.164558	0.0319052	0.84874	0.0310912
TP53	0.468966	0.55466	0.352941	0.871669	0.010605	0.527248	0.367104	0.757254	0.000529602	1.71342	0.976854	3.00536	0.0603427
APC	0.0655172	7.50547	1.79631	31.3598	0.00573015	0.652009	0.49152	0.8649	0.00300973	0.236721	0.0510376	1.09795	0.0656813
PIK3CA	0.062069	0.299601	0.0733445	1.22382	0.0932176	0.628879	0.474238	0.833946	0.00127743	3.44424	0.747894	15.8616	0.112478
RTKs	0.0862069	0.551636	0.201737	1.50841	0.246434	0.62962	0.47336	0.837464	0.00147944	2.20948	0.701097	6.96306	0.175858
NF1	0.0724138	0.642833	0.23492	1.75904	0.389604	0.633635	0.476947	0.841798	0.00164287	2.21851	0.680231	7.23548	0.186463
STK11	0.127586	1.71469	0.988963	2.97298	0.0548026	0.721795	0.534288	0.975107	0.0336522	0.623206	0.284657	1.3644	0.236892
HRR	0.110345	0.579269	0.278689	1.20404	0.143586	0.622386	0.465289	0.832525	0.00139877	1.71945	0.692405	4.26989	0.242848
PDGFRA	0.0310345	0.553545	0.076931	3.98295	0.556952	0.646517	0.489344	0.854173	0.00214705	3.48761	0.411436	29.5634	0.251978
EGFR	0.0931034	1.50318	0.723143	3.12461	0.274956	0.696743	0.522331	0.929392	0.0139678	0.585511	0.221075	1.55071	0.281421
ATM	0.0689655	0.586432	0.236676	1.45305	0.248984	0.636677	0.478836	0.846547	0.00189641	1.79933	0.590884	5.47924	0.301178
PI3K	0.134483	0.633674	0.325359	1.23415	0.179795	0.624466	0.465111	0.838417	0.00173384	1.54467	0.672838	3.54619	0.30515
BRAF	0.0482759	0.451352	0.142206	1.43257	0.17703	0.639795	0.483097	0.84732	0.00183425	2.08511	0.506061	8.5912	0.309075
NFE2L2	0.0551724	0.319457	0.100714	1.01329	0.0526783	0.629368	0.475489	0.833044	0.00120825	2.106	0.489741	9.05625	0.316948
NOTCH1	0.0413793	1.10669	0.27157	4.50994	0.887533	0.691109	0.52293	0.913376	0.00940919	0.421933	0.0752247	2.36661	0.326688
SMAD4	0.037931	0.607193	0.147786	2.4947	0.48894	0.652586	0.49341	0.863112	0.00277254	1.93453	0.377319	9.91846	0.428801
CDKN2A	0.0310345	0.69247	0.279228	1.71729	0.427755	0.646606	0.487744	0.85721	0.0024374	1.80206	0.417435	7.77948	0.429982
RB1	0.0724138	0.71747	0.289904	1.77563	0.472678	0.647078	0.486726	0.860257	0.00273557	1.53046	0.503163	4.65514	0.453369
NOTCH1/2	0.0827586	0.755335	0.363517	1.56948	0.452061	0.674892	0.506695	0.898921	0.00717544	0.663542	0.221445	1.98824	0.463836
NOTCH2	0.0448276	0.687122	0.298456	1.58193	0.377796	0.659983	0.497498	0.875536	0.00395482	0.57433	0.112905	2.92153	0.504019
BRCA2	0.0275862	0.568309	0.139439	2.31625	0.430537	0.654828	0.495655	0.865118	0.00288573	1.75901	0.286699	10.7922	0.54175
Cell cycle	0.124138	0.817011	0.442094	1.50988	0.518927	0.650476	0.483966	0.874275	0.00436418	1.14746	0.507908	2.59231	0.740811
BRCA1	0.0172414	0.557773	0.136839	2.27355	0.415465	0.656992	0.49745	0.867702	0.00307831	1.39743	0.19194	10.1741	0.741113
ARID1A	0.037931	0.968529	0.237148	3.95553	0.964473	0.674988	0.510611	0.892281	0.00577334	0.767287	0.144488	4.07458	0.755838
PTEN	0.0413793	1.98311	0.722084	5.44637	0.18409	0.672083	0.507063	0.890806	0.0057039	0.81981	0.223815	3.00288	0.764216
KRAS	0.217241	0.958335	0.603402	1.52205	0.856913	0.669767	0.484385	0.926097	0.0153366	0.939872	0.493079	1.79152	0.850554
TSC1	0.0275862	1.37759	0.433844	4.37429	0.586853	0.671907	0.508027	0.888653	0.00531141	0.856351	0.167974	4.36577	0.851977
ERBB2	0.037931	0.987953	0.311294	3.13547	0.983589	0.668042	0.504751	0.88416	0.00478907	0.968702	0.22446	4.18063	0.966003
SMO	0.0137931	0.664569	0.163113	2.70765	0.568583	0.661601	0.501201	0.873334	0.00354535	0.968308	0.0860157	10.9006	0.9792
FBXW7	0.0241379	2.16e-07	0	Inf	0.991429	0.634231	0.480533	0.83709	0.00130066	9.41772e+06	0	Inf	0.991032
MTOR	0.0137931	0.784535	0.108958	5.64895	0.809615	0.68066	0.516405	0.897159	0.00633085	1.54e-07	0	Inf	0.992121
NRAS	0.0172414	6.14e-07	0	Inf	0.993662	0.652867	0.495116	0.86088	0.00251522	3.52585e+06	0	Inf	0.99332
FGFR2	0.00689655	7.99e-08	0	Inf	0.994517	0.654405	0.496978	0.8617	0.00252664	1.53378	0	Inf	0.999905
AKT1	0.00689655	0.305106	0.0421342	2.20936	0.239914	0.649117	0.492449	0.855626	0.00216701	NA	NA	NA	NA
FGFR1	0.0103448	1.84259	0.455101	7.46017	0.391667	0.662734	0.502961	0.87326	0.00346859	NA	NA	NA	NA
FGFR3	0.0137931	1.81639	0.670949	4.91731	0.240152	0.658561	0.499422	0.868409	0.0030793	NA	NA	NA	NA

## Sheet: S8
Supplemental Table S8. The multivariable model for ISAC development in the first-line training set.
	HR (95% CI)	P	Coefficient
Treatment	0.52 (0.34-0.80)	0.003
EGFR	2.10 (0.92-4.77)	0.077
TP53	0.57 (0.35-0.94)	0.029
STK11	1.28 (0.71-2.28)	0.41
WNT	6.32 (2.28-17.51)	<0.001
PIK3CA	0.47 (0.11-2.02)	0.31
RTKs	0.68 (0.24-1.92)	0.46
HRR	0.75 (0.35-1.59)	0.46
NF1	0.39 (0.13-1.19)	0.099
Treatment*EGFR	0.45 (0.16-1.29)	0.14	-0.800
Treatment*TP53	1.54 (0.83-2.85)	0.17	0.431
Treatment*STK11	0.80 (0.35-1.81)	0.59	-0.222
Treatment*WNT	0.21 (0.07-0.67)	0.008	-1.550
Treatment*PIK3CA	2.14 (0.44-10.47)	0.35	0.761
Treatment*RTKs	1.73 (0.52-5.71)	0.37	0.545
Treatment*HRR	1.36 (0.54-3.47)	0.52	0.310
Treatment*NF1	3.56 (0.96-13.16)	0.057	1.268

## Sheet: S9
Supplemental Table S9. Association between characteristics and the ISAC
	Category	Average	P value
Age			0.35
	>=65	0.146
	<65	0.193
Sex			0.34
	Female	0.133
	Male	0.202
Tumoral PD-L1 expression			0.12
	<1	0.234
	[1, 50)	0.122
TMB			0.34
	<=median	0.03
	>median	0.119

## Sheet: S10
Supplemental Table S10. Multivariable models in the first-line total set.
PFS (first-line)
	Single interaction								Multiple interactions
PD-L1 expression (TPS>=1 vs. <1)	0.77 (0.55-1.08)	0.13							0.94 (0.43-2.08)	0.89	0.91 (0.41-2.03)	0.82
TMB (>median vs. <=median)			0.41 (0.16-1.06)	0.067					0.50 (0.19-1.32)	0.16	0.38 (0.14-1.00)	0.049
ISAC (high vs. low)					0.21 (0.09-0.45)	<0.001			0.47 (0.31-0.70)	<0.001
ISAC (continuous variable)							0.55 (0.38-0.78)	<0.001			0.38 (0.23-0.62)	<0.001
Treatment (ICI+chemo vs. ICI alone)	0.99 (0.46-2.13)	0.97	0.47 (0.31-0.70)	<0.001	0.48 (0.35-0.65)	<0.001	0.71 (0.53-0.95)	0.021	0.47 (0.29-0.78)	0.004	0.17 (0.09-0.34)	<0.001
PD-L1 expression*Treatment	0.84 (0.54-1.33)	0.46							0.86 (0.54-1.36)	0.51	0.87 (0.55-1.39)	0.56
TMB*Treatment			1.51 (0.82-2.78)	0.18					1.42 (0.76-2.66)	0.27	1.60 (0.86-2.96)	0.14
ISAC (high vs. low)*Treatment					2.24 (1.43-3.53)	<0.001			1.42 (1.12-1.81)	0.004
ISAC (continuous variable)*Treatment							1.72 (1.12-2.65)	0.014			2.35 (1.61-3.42)	<0.001
OS (first-line)
	Single interaction								Multiple interactions
PD-L1 expression (TPS>=1 vs. <1)	0.52 (0.20-1.37)	0.19							0.50 (0.19-1.34)	0.17	0.50 (0.19-1.35)	0.17
TMB (>median vs. <=median)			0.44 (0.13-1.46)	0.18					0.51 (0.15-1.71)	0.27	0.48 (0.14-1.59)	0.23
ISAC (high vs. low)					0.24 (0.09-0.64)	0.004			0.46 (0.28-0.77)	0.003
ISAC (continuous variable)							0.42 (0.30-0.59)	<0.001			0.32 (0.17-0.60)	<0.001
Treatment (ICI+chemo vs. ICI alone)	0.64 (0.42-0.98)	0.041	0.43 (0.25-0.73)	0.002	0.54 (0.36-0.79)	0.002	0.59 (0.47-0.75)	<0.001	0.35 (0.18-0.67)	0.001	0.30 (0.15-0.63)	0.001
PD-L1 expression*Treatment	1.33 (0.74-2.37)	0.34							1.36 (0.75-2.45)	0.31	1.35 (0.75-2.44)	0.32
TMB*Treatment			1.55 (0.71-3.42)	0.27					1.48 (0.66-3.33)	0.34	1.50 (0.68-3.33)	0.31
ISAC (high vs. low)*Treatment					2.08 (1.16-3.72)	0.014			1.43 (1.05-1.95)	0.023
ISAC (continuous variable)*Treatment							2.41 (1.66-3.50)	<0.001			1.71 (1.12-2.61)	0.012

[truncated: 2 more sheets: S11, S12]
